# Supplementary material for: Predicting the Types of J-Proteins Using Clustered Amino Acids
Source: Biomed Res Int. 2014 Apr 2;2014:935719. doi: 10.1155/2014/935719 (PMC3996952; doi:10.1155/2014/935719)
Supplement: Supplementary file 1 — According to the binomial distribution, we analyzed the distribution of the tripeptides and found the over-presented tripeptides in each J-protein families. Listed in Supporting Table S1 are the over-presented tripeptides with confidence level (=1-p) greater than 99.9%. [file 935719.f1.xlsx]

## Sheet: Over presented tripeptides
Supplementary Tables S1. The over-presented tripeptide in each J-Protein family. Listed are the tripeptides with confidence level (=1-p) greater than 99.9%.
Type-I	p-value		Type-II	p-value		Type-III	p-value		Type-IV	p-value
MAN	0.000115		AGG	0		EEE	3e-06		QSK	0
PQQ	0.000338		DIF	0		LAA	7.9e-05		SFY	0
			DLF	0		DDD	8.6e-05		LQS	0
			DLV	0		EKA	9.2e-05		SKV	0
			DLY	0		ERA	0.000201		FYL	0
			EGM	0		SDD	0.000355		GSF	0
			FFG	0		QRR	0.000558		YLQ	0
			FGG	0		SRR	0.000736		ASK	7e-06
			GAG	0		KSL	0.00074		ILN	8e-06
			GAR	0		EDD	0.000869		KPE	5e-05
			GDL	0					CLE	0.000112
			GFG	0					KTM	0.00012
			GGA	0					VMG	0.00019
			GGF	0					QEA	0.00022
			GGG	0					QIL	0.000229
			GGM	0					IVM	0.00025
			GGP	0					QAA	0.000253
			GGQ	0					KVV	0.000267
			GKG	0					GGS	0.000323
			GMG	0					FRA	0.000477
			GMP	0					SKI	0.000567
			GPG	0					AKE	0.000599
			GQG	0					LES	0.000599
			GRG	0					VFR	0.000617
			GTK	0					LNI	0.000626
			IPA	0					KVF	0.000695
			KFK	0					TWE	0.000796
			KIP	0					KVY	0.000862
			MFG	0					RAK	0.000952
			MGG	0
			NNN	0
			PAG	0
			PGD	0
			PGG	0
			QGG	0
			RGD	0
			TLD	0
			TLE	0
			VKI	0
			FPK	1e-06
			GFE	1e-06
			GGR	1e-06
			KPG	1e-06
			VHV	1e-06
			YGE	1e-06
			DLH	2e-06
			FKE	2e-06
			VTI	2e-06
			FGS	3e-06
			FQG	3e-06
			QGF	4e-06
			YDQ	4e-06
			IRF	5e-06
			KYH	5e-06
			RQG	7e-06
			GGT	9e-06
			GTT	9e-06
			PFG	1.3e-05
			RDG	1.4e-05
			AYR	1.5e-05
			DYY	1.5e-05
			RPG	1.7e-05
			GWK	1.8e-05
			DQY	2e-05
			PGP	2e-05
			PGT	2e-05
			IDG	2.1e-05
			FVI	2.2e-05
			KAY	2.3e-05
			TIP	2.4e-05
			LDG	2.6e-05
			LYD	3e-05
			FGD	3.1e-05
			GEG	3.6e-05
			ISL	4e-05
			EKF	4.2e-05
			RGP	4.3e-05
			KEI	4.7e-05
			KPH	5e-05
			QYG	5e-05
			FPG	5.6e-05
			IFG	6.4e-05
			IEV	7.3e-05
			PGW	8.1e-05
			KGA	8.2e-05
			GDP	9.3e-05
			HVD	9.8e-05
			FSG	0.000103
			KKA	0.000113
			PHP	0.000113
			DQF	0.000114
			GEE	0.000116
			YTF	0.000125
			AGF	0.000128
			LYV	0.00013
			PEK	0.000141
			PGY	0.000154
			VPT	0.000156
			GTR	0.000167
			KGT	0.000167
			EAY	0.000175
			LGG	0.000176
			GIK	0.000186
			RGN	0.000231
			DGR	0.000237
			GFN	0.00024
			YEV	0.000241
			NDL	0.000266
			LKG	0.000287
			VTL	0.000297
			QPG	0.000315
			PGM	0.000326
			TIS	0.000338
			LGM	0.000349
			LGV	0.000363
			FTG	0.000387
			TVH	0.000431
			IKK	0.000454
			GGK	0.000458
			TGD	0.000469
			YVH	0.000477
			KVT	0.000526
			GHD	0.000537
			KGM	0.000537
			VSK	0.000545
			VTV	0.000577
			QRG	0.000675
			QGE	0.000693
			AGR	0.000699
			DGQ	0.000702
			GFR	0.000702
			QFG	0.000705
			PPG	0.000734
			GNN	0.000855
			RGG	0.000863
			EII	0.000877
			ARG	0.00088
			ITI	0.000899
			DPK	0.000925
			DPG	0.000939
			GDD	0.000952
			SGA	0.000966
			CTL	0.000973
			CPN	0.000986
